# Supplementary material for: A comparative study of RNA-Seq and microarray data analysis on the two examples of rectal-cancer patients and Burkitt Lymphoma cells
Source: PubMed Central journal article supplement (PMC5955523; doi:10.1371/journal.pone.0197162), 2018-05-16

A

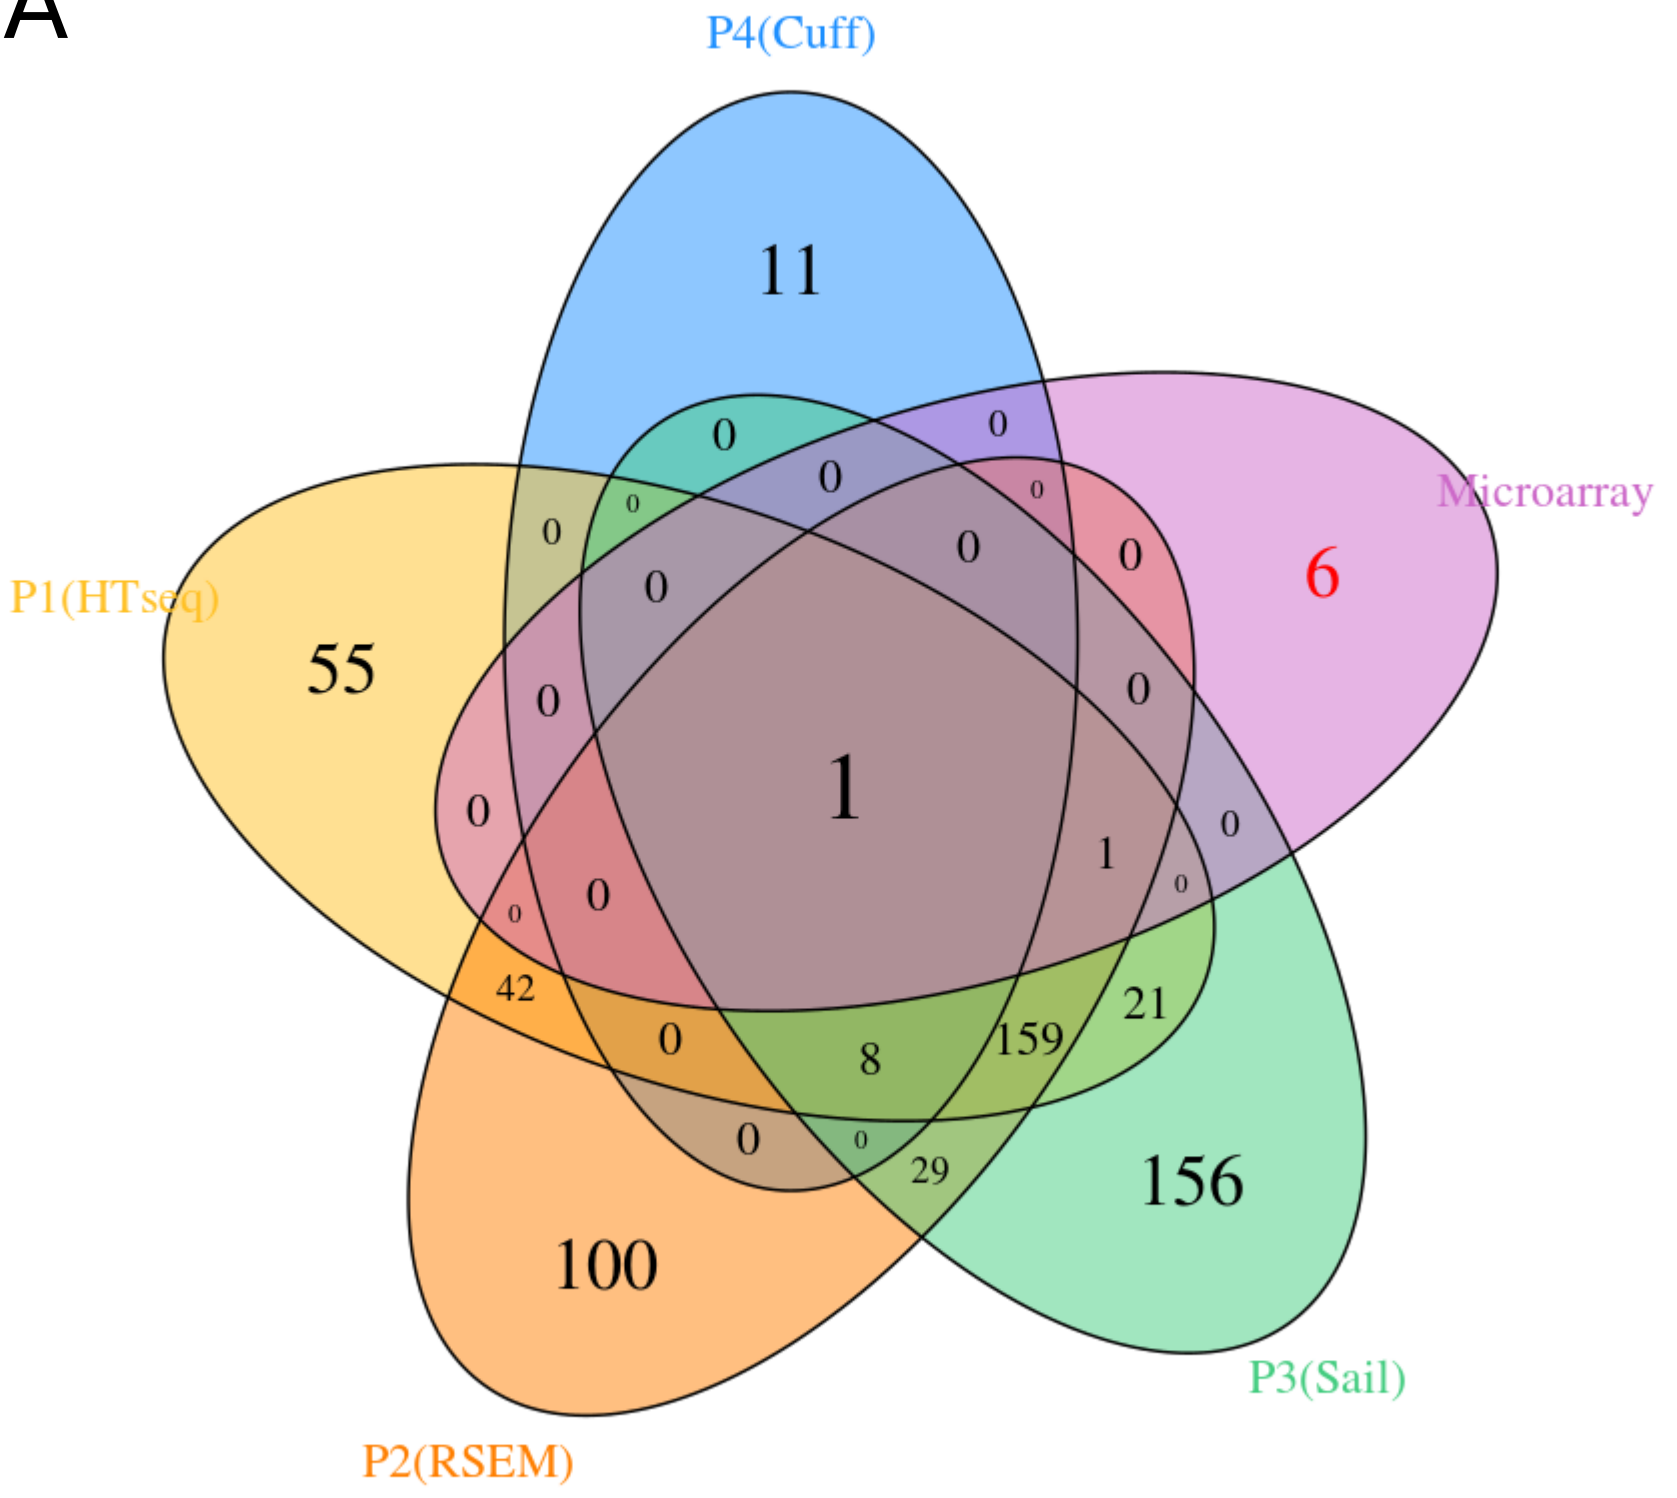

B

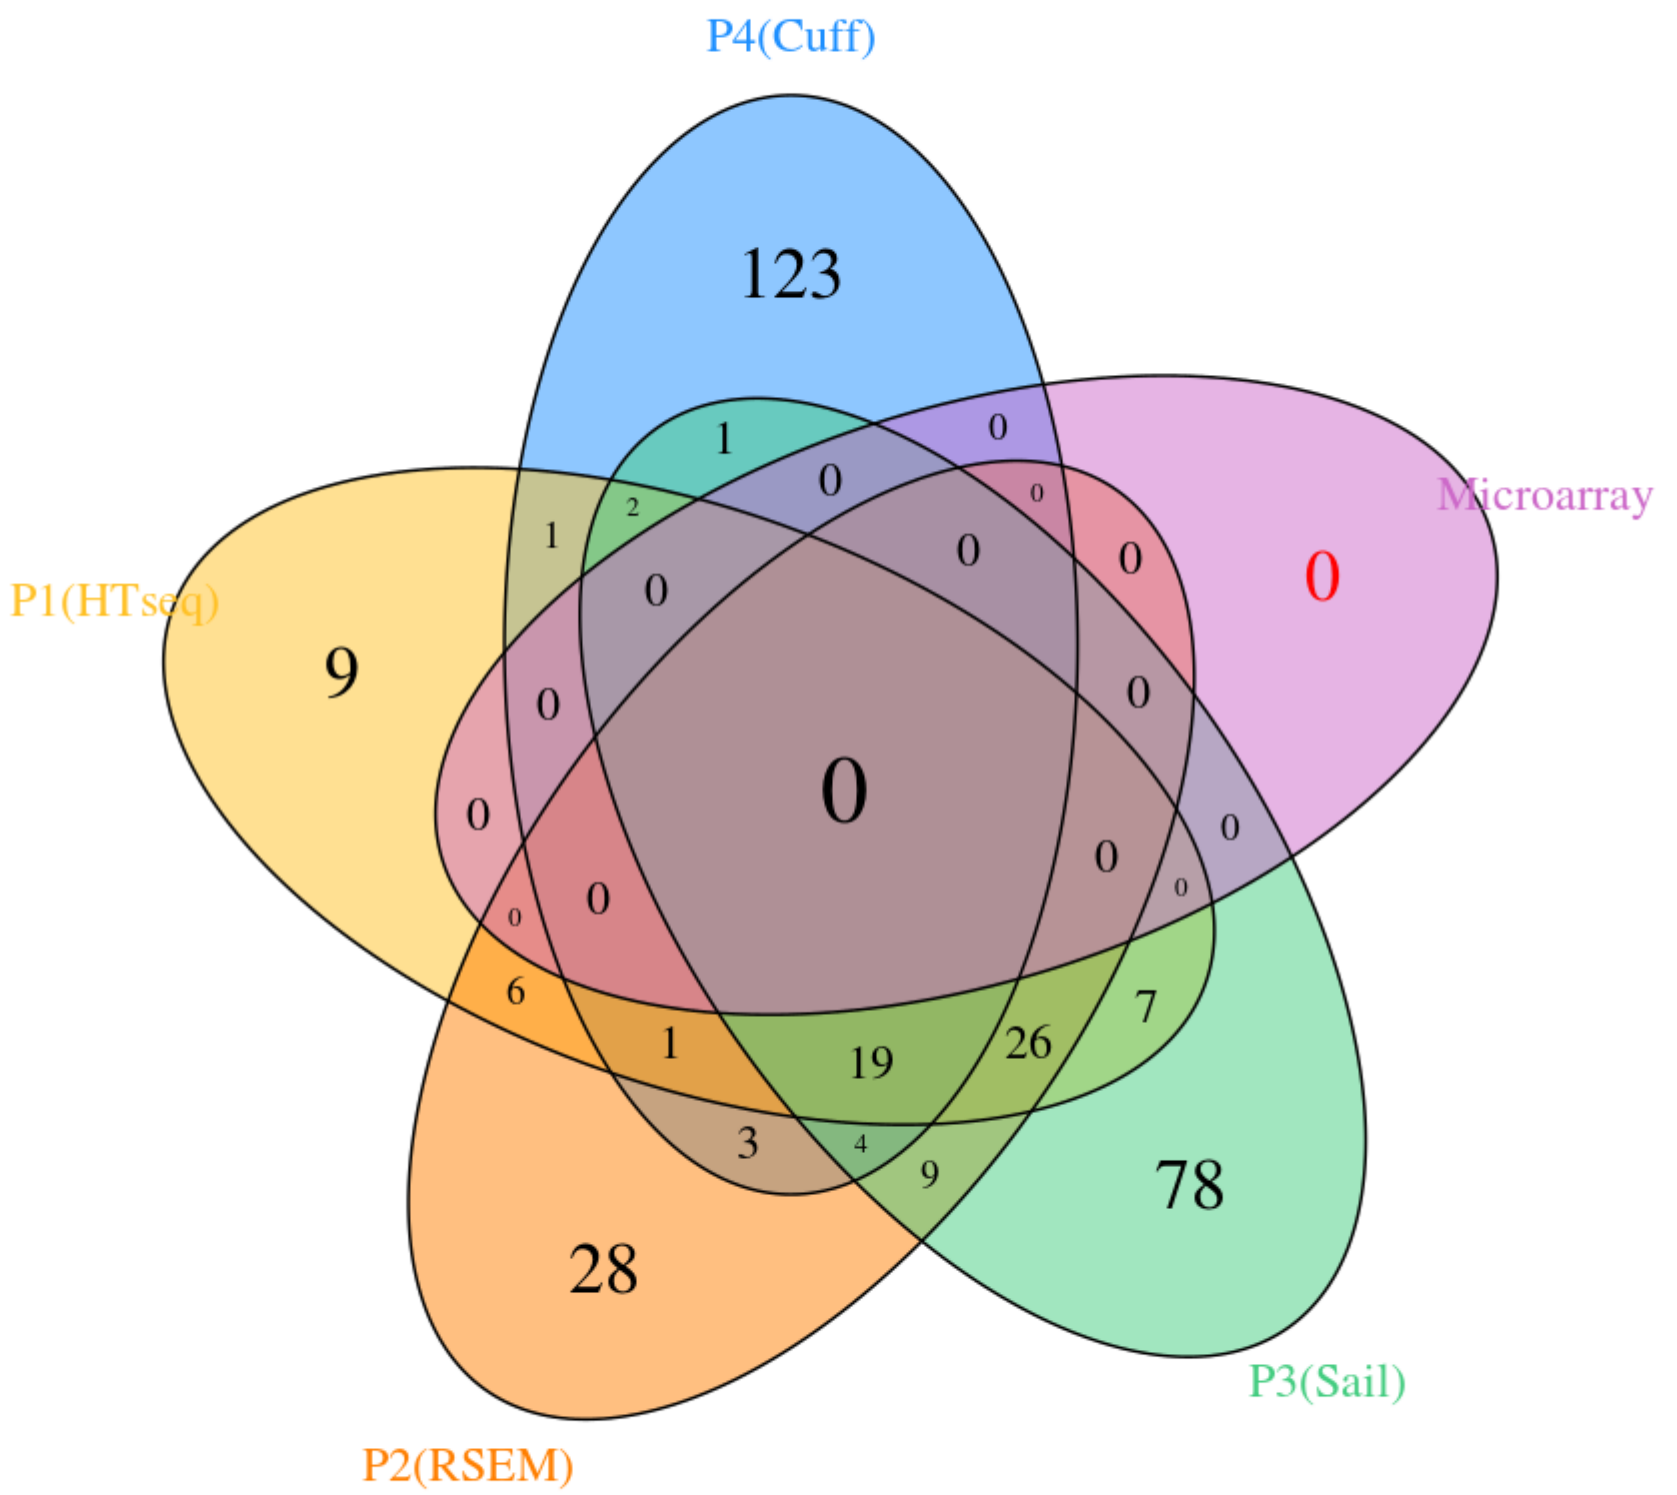

Supplement: pone.0197162.s007.pdf [file pone.0197162.s007.pdf]
