# Supplementary material for: A comparative study of RNA-Seq and microarray data analysis on the two examples of rectal-cancer patients and Burkitt Lymphoma cells
Source: PubMed Central journal article supplement (PMC5955523; doi:10.1371/journal.pone.0197162), 2018-05-16
Supplement: pone.0197162.s008.pdf [file pone.0197162.s008.pdf]

**A**

GO:0060333 interferon-gamma-mediated signaling pathway  
 GO:0019886 antigen processing and presentation of exogenous peptide antigen via MHC class II  
 GO:0050852 T cell receptor signaling pathway  
 GO:0031295 T cell costimulation  
 GO:0006000 fructose metabolic process  
 GO:0002381 immunoglobulin production involved in immunoglobulin mediated immune response  
 GO:0006096 glycolysis  
 GO:0045060 negative thymic T cell selection  
 GO:0016064 immunoglobulin mediated immune response  
 GO:0006003 fructose 2,6-bisphosphate metabolic process  
 GO:0006468 protein phosphorylation  
 GO:0032673 regulation of interleukin-4 production  
 GO:0002606 positive regulation of dendritic cell antigen processing and presentation  
 GO:0002437 inflammatory response to antigenic stimulus  
 GO:2001179 regulation of interleukin-10 secretion  
 GO:0010243 response to organonitrogen compound  
 GO:0051056 regulation of small GTPase mediated signal transduction  
 GO:0042130 negative regulation of T cell proliferation  
 GO:0035774 positive regulation of insulin secretion involved in cellular response to glucose stimulus  
 GO:0001816 cytokine production  
 GO:0030182 neuron differentiation  
 GO:0090023 positive regulation of neutrophil chemotaxis  
 GO:0046835 carbohydrate phosphorylation  
 GO:0002764 immune response-regulating signaling pathway  
 GO:0001932 regulation of protein phosphorylation  
 GO:0002790 peptide secretion  
 GO:0002883 regulation of hypersensitivity  
 GO:0016045 detection of bacterium  
 GO:0030217 T cell differentiation  
 GO:0050702 interleukin-1 beta secretion  
 GO:0042088 T-helper 1 type immune response  
 GO:0046330 positive regulation of JNK cascade  
 GO:0043552 positive regulation of phosphatidylinositol 3-kinase activity  
 GO:0032735 positive regulation of interleukin-12 production  
 GO:0032653 regulation of interleukin-10 production  
 GO:0032689 negative regulation of interferon-gamma production  
 GO:0030334 regulation of cell migration  
 GO:0042127 regulation of cell proliferation  
 GO:0050900 leukocyte migration  
 GO:0030838 positive regulation of actin filament polymerization  
 GO:2000510 positive regulation of dendritic cell chemotaxis  
 GO:0042940 D-amino acid transport  
 GO:0002455 humoral immune response mediated by circulating immunoglobulin  
 GO:0003096 renal sodium ion transport  
 GO:0002885 positive regulation of hypersensitivity  
 GO:0001771 immunological synapse formation  
 GO:0001768 establishment of T cell polarity  
 GO:0031529 ruffle organization  
 GO:0043122 regulation of I-kappaB kinase/NF-kappaB signaling  
 GO:0045409 negative regulation of interleukin-6 biosynthetic process  
 GO:0060453 regulation of gastric acid secretion  
 GO:0043066 negative regulation of apoptotic process  
 GO:0050862 positive regulation of T cell receptor signaling pathway  
 GO:0016477 cell migration  
 GO:0071731 response to nitric oxide  
 GO:0072676 lymphocyte migration  
 GO:0007015 actin filament organization  
 GO:0044281 small molecule metabolic process  
 GO:0031274 positive regulation of pseudopodium assembly  
 GO:0042994 cytoplasmic sequestering of transcription factor  
 GO:0002922 positive regulation of humoral immune response  
 GO:0034695 response to prostaglandin E  
 GO:0010560 positive regulation of glycoprotein biosynthetic process  
 GO:0006915 apoptotic process  
 GO:2000107 negative regulation of leukocyte apoptotic process  
 GO:0006886 intracellular protein transport  
 GO:0070293 renal absorption  
 GO:0097028 dendritic cell differentiation  
 GO:0002695 negative regulation of leukocyte activation  
 GO:0001954 positive regulation of cell-matrix adhesion  
 GO:0030198 extracellular matrix organization  
 GO:0007420 brain development  
 GO:0050706 regulation of interleukin-1 beta secretion  
 GO:0015804 neutral amino acid transport  
 GO:0032862 activation of Rho GTPase activity  
 GO:0018108 peptidyl-tyrosine phosphorylation  
 GO:0000060 protein import into nucleus, translocation  
 GO:0051491 positive regulation of filopodium assembly  
 GO:0007616 long-term memory  
 GO:0032411 positive regulation of transporter activity  
 GO:0061098 positive regulation of protein tyrosine kinase activity  
 GO:0009755 hormone-mediated signaling pathway  
 GO:0010977 negative regulation of neuron projection development  
 GO:0032024 positive regulation of insulin secretion  
 GO:0045087 innate immune response



P2(RSEM)  
P1(HTSeq)  
P3(Sail)  
P4(Cuff)  
Microarray

**B**

GO:0045071 negative regulation of viral genome replication  
 GO:0051607 defense response to virus  
 GO:0035810 positive regulation of urine volume  
 GO:0060337 type I interferon signaling pathway  
 GO:0090103 cochlea morphogenesis  
 GO:0030574 collagen catabolic process  
 GO:0042474 middle ear morphogenesis  
 GO:0030199 collagen fibril organization  
 GO:0007275 multicellular organismal development  
 GO:0022617 extracellular matrix disassembly  
 GO:0003229 ventricular cardiac muscle tissue development  
 GO:0016266 O-glycan processing  
 GO:2000551 regulation of T-helper 2 cell cytokine production  
 GO:0090263 positive regulation of canonical Wnt signaling pathway  
 GO:0002158 osteoclast proliferation  
 GO:0045669 positive regulation of osteoblast differentiation  
 GO:0071711 basement membrane organization  
 GO:0090090 negative regulation of canonical Wnt signaling pathway  
 GO:0035989 tendon development  
 GO:0030853 negative regulation of granulocyte differentiation  
 GO:0002726 positive regulation of T cell cytokine production  
 GO:0030818 negative regulation of cAMP biosynthetic process  
 GO:0045650 negative regulation of macrophage differentiation  
 GO:0042473 outer ear morphogenesis  
 GO:0033690 positive regulation of osteoblast proliferation  
 GO:0034587 piRNA metabolic process  
 GO:0048752 semicircular canal morphogenesis  
 GO:0046628 positive regulation of insulin receptor signaling pathway  
 GO:0003266 regulation of secondary heart field cardioblast proliferation  
 GO:0048704 embryonic skeletal system morphogenesis  
 GO:0030072 peptide hormone secretion  
 GO:0007229 integrin-mediated signaling pathway  
 GO:0002063 chondrocyte development  
 GO:0033688 regulation of osteoblast proliferation  
 GO:0071600 otic vesicle morphogenesis  
 GO:0030157 pancreatic juice secretion  
 GO:0001501 skeletal system development  
 GO:0051000 positive regulation of nitric-oxide synthase activity  
 GO:0060122 inner ear receptor stereocilium organization  
 GO:0090177 establishment of planar polarity involved in neural tube closure  
 GO:0035051 cardiocyte differentiation  
 GO:0050910 detection of mechanical stimulus involved in sensory perception of sound  
 GO:0045725 positive regulation of glycogen biosynthetic process  
 GO:0034123 positive regulation of toll-like receptor signaling pathway  
 GO:0000132 establishment of mitotic spindle orientation  
 GO:0042554 superoxide anion generation  
 GO:0043046 DNA methylation involved in gamete generation  
 GO:0010575 positive regulation vascular endothelial growth factor production  
 GO:0060037 pharyngeal system development  
 GO:0001580 detection of chemical stimulus involved in sensory perception of bitter taste  
 GO:0007507 heart development  
 GO:0030335 positive regulation of cell migration  
 GO:0048662 negative regulation of smooth muscle cell proliferation  
 GO:2001240 negative regulation of intrinsic apoptotic signaling pathway in absence of ligand  
 GO:0030198 extracellular matrix organization  
 GO:0007156 homophilic cell adhesion  
 GO:0055010 ventricular cardiac muscle tissue morphogenesis  
 GO:0003151 outflow tract morphogenesis  
 GO:1902476 chloride transmembrane transport  
 GO:0045840 positive regulation of mitosis  
 GO:0042472 inner ear morphogenesis  
 GO:0043367 CD4-positive, alpha-beta T cell differentiation  
 GO:0030278 regulation of ossification  
 GO:0006898 receptor-mediated endocytosis  
 GO:0007193 adenylate cyclase-inhibiting G-protein coupled receptor signaling pathway  
 GO:0071333 cellular response to glucose stimulus  
 GO:0008217 regulation of blood pressure  
 GO:0050679 positive regulation of epithelial cell proliferation  
 GO:0051216 cartilage development  
 GO:0001666 response to hypoxia  
 GO:0007420 brain development  
 GO:0014706 striated muscle tissue development  
 GO:0009615 response to virus  
 GO:0007155 cell adhesion  
 GO:0030879 mammary gland development  
 GO:0007517 muscle organ development  
 GO:0030154 cell differentiation  
 GO:0008285 negative regulation of cell proliferation  
 GO:0010951 negative regulation of endopeptidase activity  
 GO:0001701 in utero embryonic development  
 GO:0043406 positive regulation of MAP kinase activity  
 GO:0043065 positive regulation of apoptotic process  
 GO:0016477 cell migration  
 GO:0055114 oxidation-reduction process  
 GO:0006508 proteolysis  
 GO:0051302 regulation of cell division  
 GO:0001934 positive regulation of protein phosphorylation  
 GO:0000165 MAPK cascade



P2(RSEM)  
P1(HTSeq)  
P3(Sail)  
Microarray  
P4(Cuff)
